# Supplementary material
Source: PubMed Central journal article supplement (PMC6174397)
Supplement: MDC3-4-806-s002.pdf [file MDC3-4-806-s002.pdf]

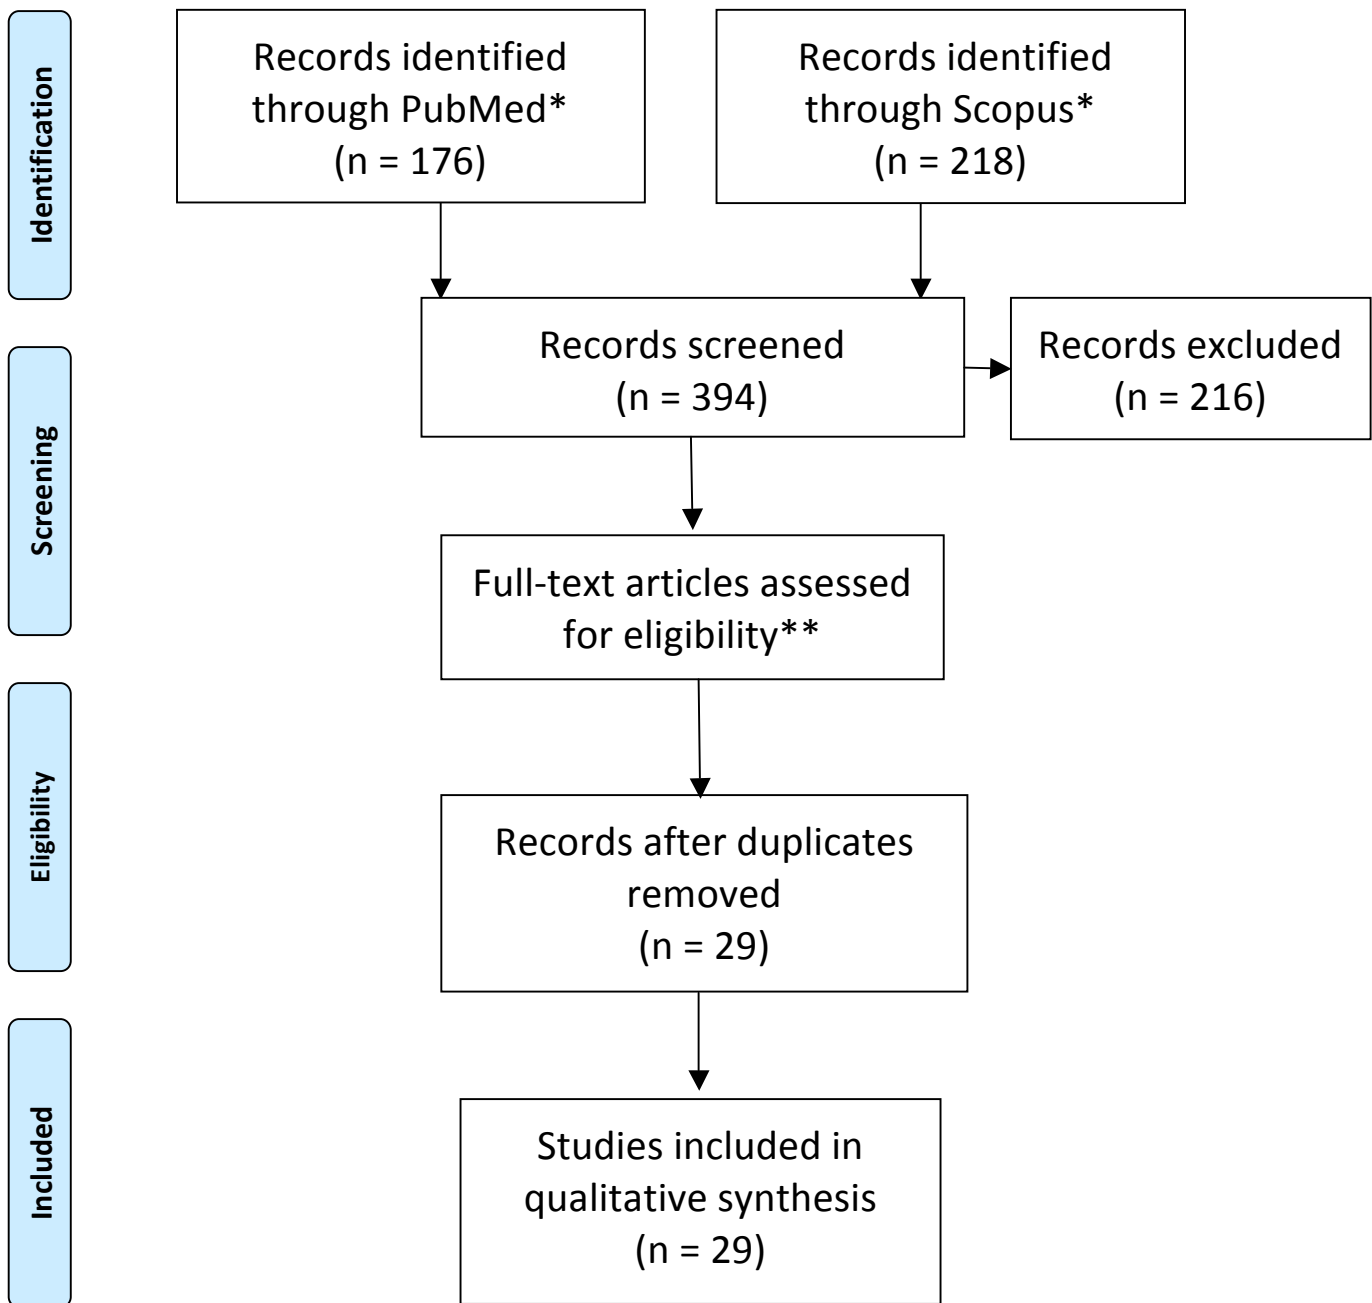

\*Details of keywords and combinations are provided in supplementary Table 1

\*\*Details of inclusion criteria are provided in the main text (search strategy and selection criteria)
